# Supplementary material for: Identification of peripheral neural circuits that regulate heart rate using optogenetic and viral vector strategies
Source: PubMed Central journal article supplement (PMC6486614; doi:10.1038/s41467-019-09770-1), 2019-04-26
Supplement: 41467_2019_9770_MOESM4_ESM.pdf [file 41467_2019_9770_MOESM4_ESM.pdf]

## **Description of Additional Supplementary Files**

**File Name:** Supplementary Movie 1

**Description:** Movie corresponds to Figure 1c. 3D confocal projection (1200  $\mu\text{m}$  z-stack) of the dorsal side of a whole iDISCO-cleared heart with PGP9.5 staining (gray).

**File Name:** Supplementary Movie 2

**Description:** Movie corresponds to Figure 1. 3D projection (5590  $\mu\text{m}$  z-stack) of a whole iDISCO-cleared heart with PGP9.5 staining (green). The heart was imaged with a lightsheet microscope.

**File Name:** Supplementary Movie 3

**Description:** Movie corresponds to Figure 1c. Confocal z-stack (785  $\mu\text{m}$  zstack) through the left ventricle of a whole iDISCO-cleared heart with PGP9.5 staining (gray). A dense network of nerve fibers is observed from the epi- to endocardium.

**File Name:** Supplementary Movie 4

**Description:** Movie corresponds to Supplementary Figure 2b. 3D confocal projection (402  $\mu\text{m}$  z-stack) of the left atrium of a PACT-cleared heart in which cholinergic nerve fibers (gray) were virally labelled.

**File Name:** Supplementary Movie 5

**Description:** Movie corresponds to Supplementary Figure 2c. 3D confocal projection (1000  $\mu\text{m}$  z-stack) of the dorsal atrial wall of a PACT-cleared heart in which noradrenergic neurons (gray) in cardiac ganglia were endogenously labelled.

**File Name:** Supplementary Movie 6

**Description:** Movie corresponds to Supplementary Figure 2c. 3D confocal projection (85  $\mu\text{m}$  z-stack) of the ventricle of a PACT-cleared heart in which noradrenergic nerve fibers (gray) were endogenously labelled.

**File Name:** Supplementary Movie 7

**Description:** Movie corresponds to Figure 5c. 3D confocal projection (173  $\mu\text{m}$  z-stack) of cardiac-projecting neurons in the LSG labeled with CTB-488.
